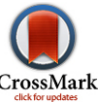

# Mechanisms of U87 Astrocytoma Cell Uptake and Trafficking of Monomeric versus Protofibril Alzheimer's Disease Amyloid- $\beta$ Proteins

Yali Li<sup>1</sup>, Deshu Cheng<sup>1</sup>, Ran Cheng, Xinyu Zhu, Tao Wan, Jianmiao Liu, Rongying Zhang\*

Key Laboratory of Molecular Biophysics of the Ministry of Education, School of Life Science and Technology, Huazhong University of Science and Technology, Wuhan, Hubei, China

## Abstract

A significant hallmark of Alzheimer's disease is the formation of senile plaques in the brain due to the unbalanced levels of amyloid-beta ( $A\beta$ ). However, although how  $A\beta$  is produced from amyloid precursor proteins is well understood, little is known regarding the clearance and metabolism of various  $A\beta$  aggregates from the brain. Similarly, little is known regarding how astrocytes internalize and degrade  $A\beta$ , although astrocytes are known to play an important role in plaque maintenance and  $A\beta$  clearance. The objective of this study is to investigate the cellular mechanisms that mediate the internalization of soluble monomeric versus oligomeric  $A\beta$  by astrocytes. We used a combination of laser confocal microscopy and genetic and pharmacological experiments to dissect the internalization of s $A\beta$ 42 and o $A\beta$ 42 and their postendocytic transport by U87 human brain astrocytoma cell line. Both  $A\beta$ 42 species were internalized by U87 cells through fluid phase macropinocytosis, which required dynamin 2. Depleting LDL receptor-related protein 1 (LRP1) decreased s $A\beta$ 42 uptake more significantly than that of o $A\beta$ 42. We finally show that both  $A\beta$ 42 species were rapidly transported to lysosomes through an endolytic pathway and subjected to proteolysis after internalization, which had no significant toxic effects to the U87 cells under relatively low concentrations. We propose that macropinocytic s $A\beta$ 42 and o $A\beta$ 42 uptake and their subsequent proteolytic degradation in astroglial cells is a significant mechanism underlying  $A\beta$  clearance from the extracellular milieu. Understanding the molecular events involved in astrocytic  $A\beta$  internalization may identify potential therapeutic targets for Alzheimer's disease.

**Citation:** Li Y, Cheng D, Cheng R, Zhu X, Wan T, et al. (2014) Mechanisms of U87 Astrocytoma Cell Uptake and Trafficking of Monomeric versus Protofibril Alzheimer's Disease Amyloid- $\beta$  Proteins. PLoS ONE 9(6): e99939. doi:10.1371/journal.pone.0099939

**Editor:** Sergio T. Ferreira, Federal University of Rio de Janeiro, Brazil

**Received:** December 13, 2013; **Accepted:** May 20, 2014; **Published:** June 18, 2014

**Copyright:** © 2014 Li et al. This is an open-access article distributed under the terms of the Creative Commons Attribution License, which permits unrestricted use, distribution, and reproduction in any medium, provided the original author and source are credited.

**Funding:** This work was supported by Grants from the Major State Basic Research Program of China (2011CB910402) and the National Science Foundation of China (31071249). The funders had no role in study design, data collection and analysis, decision to publish, or preparation of the manuscript.

**Competing Interests:** The authors have declared that no competing interests exist.

\* E-mail: ryzhang@mail.hust.edu.cn

These authors contributed equally to this work.

## Introduction

Senile plaques in the brain are one of the hallmarks of Alzheimer's disease (AD). The main component of these senile plaques is amyloid-beta ( $A\beta$ ), a metabolic product of amyloid precursor protein (APP). Steady-state levels of  $A\beta$  in the normal brain are maintained by a balance between its production and clearance. However, this balance is broken in the AD brain due to either  $A\beta$  overproduction or reduced  $A\beta$  clearance. Thus,  $A\beta$  can accumulate in the brain and form amyloid plaques that cause dementia and neurodegeneration [1]. It has been reported that only 5% of AD cases (familial type) is due to  $A\beta$  overproduction arising from mutations in the APP gene or in APP processing enzymes, whereas the majority (95%) of so-called sporadic AD cases are likely caused by dysfunctions in  $A\beta$  solubility, endocytosis, degradation, transcytosis, and removal [2]. However, despite the dramatic progress that has been achieved in understanding how  $A\beta$  is produced from APP, the mechanisms of  $A\beta$  aggregation, clearance from the brain, and metabolism remain unclear [3].

The AD brain contains soluble and insoluble assemblies of  $A\beta$ , both of which have been hypothesized to underlie dementia [4].

Insoluble fibrillar forms of  $A\beta$  arise from the polymerization of the soluble, monomeric, or oligomeric forms of  $A\beta$  peptides. Early evidence for  $A\beta$ -induced neurotoxicity in cell culture and *in vivo* was associated with fibrillar forms, such as those observed in neuritic (amyloid) plaques. Recent studies have highlighted that natural as well as synthesized  $A\beta$ 42 oligomers (o $A\beta$ 42) and immature fibrils exert much greater toxic effects on neurons and disrupt learned behavior in a rapid, potent, and transient manner [5,6,7]. A central message from these studies is that subtle brain dysfunction occurs in the presymptomatic stages of AD that may be related to  $A\beta$  oligomer effects; therefore, these effects may be reversible with appropriate interventions before widespread neuronal degeneration occurs.

One of the main questions under debate concerning  $A\beta$  toxicity is the (sub-) cellular localization of action. In addition to the deposition of  $A\beta$  peptides into extracellular plaques, numerous studies have provided evidence for the presence of  $A\beta$  within neurons in post-mortem AD and transgenic mouse brains [8]. It is unknown whether intraneuronal  $A\beta$  originates from the retention and subsequent aggregation of intracellularly generated  $A\beta$  or from the reuptake of extracellular  $A\beta$ . The accumulation of

activated microglial cells and astrocytes close to A $\beta$  deposits suggests that these cells play a role in AD pathology.

Microglial cells are mononuclear phagocytes of the innate immune system in the central nervous system (CNS). These cells reportedly mediate the clearance of fibrillar A $\beta$  (fA $\beta$ ) through receptor-mediated phagocytosis and internalize soluble A $\beta$  (sA $\beta$ ) from the extracellular milieu through a nonsaturable, fluid phase macropinocytic mechanism [9]. Internalized A $\beta$  subsequently undergoes proteolytic degradation in late endolysosomal compartments, which suggests a neuroprotective role for microglial cells via their ability to internalize and degrade A $\beta$  [10,11,12,13].

However, astrocytes are the most abundant cell type in the CNS. Nielsen *et al.* [14,15] showed that primary human astrocytes in culture could bind to and ingest A $\beta$ , which supported the assumption that astrocytes played an important role in plaque maintenance and A $\beta$  clearance. Mulder *et al.* [16] examined the expression of the potential rodent astrocytic A $\beta$ -receptors SCARB1, MARCO, and LRP2 by cultured primary human astrocytes isolated from brain specimens of non-demented control subjects and AD patients. However, little is known about the astrocyte endocytic mechanism and which receptor(s) mediate the uptake of A $\beta$ , particularly for oligomeric A $\beta$  in astrocytic cells [4,17].

Taken together, the regulation of sA $\beta$  levels is a critical determinant in the development of AD pathology. In this study, we focused on how astrocytes, the major glial cell type in the CNS, participated in maintaining A $\beta$  homeostasis. Because the aggregation status (solubility) of A $\beta$  goes hand in hand with its clearance [15], we systematically compared the uptake and postendocytic trafficking of soluble monomeric amyloid-beta protein (sA $\beta$ ) and protofibril (PF), an oligomeric assembly of A $\beta$  (referred to here as oA $\beta$ ). We studied A $\beta$ 42, because several lines of evidence show that it is the A $\beta$ 42 peptide other than A $\beta$ 40, which is observed in neurons [4,18,19]. We demonstrate macropinocytic sA $\beta$ 42 and oA $\beta$ 42 uptake and their subsequent proteolytic degradation in U87 cells, which may represent a significant mechanism that underlies A $\beta$  clearance from the extracellular milieu. Although several reports have suggested that lipoprotein-related protein 1 (LRP1)-mediated A $\beta$  uptake in glial cells, to the best of our knowledge, our study is the first to provide direct evidence that LRP1 is differentially involved in the internalization of the monomeric and oligomeric forms of A $\beta$ 42 by U87 cells. Furthermore, we quantified the degradation for these two forms of A $\beta$ 42 peptides in U87 cells, which may constitute a risk factor for senile plaque formation. This is relevant to developing an appropriate therapeutic approach for AD.

## Materials and Methods

### Reagents and Plasmids

HiLyte Fluor555-labeled A $\beta$ 42 was from Anaspec (Fremont, CA, USA). High glucose Dulbecco's modified Eagle Medium (DMEM), fetal bovine serum (FBS), Opti-MEM (OMEM), Lipofectamine 2000, Alexa568-Tfn and LysoTracker Green were from Invitrogen (Shanghai, China). Amiloride hydrochloride hydrate, Methyl- $\beta$ -cyclodextrin, wortmannin, Saponin, Thioflavin T and DAPI were from Sigma-Aldrich (St. Louis, MO, USA). CellTiter 96<sup>®</sup> AQ<sub>ueous</sub> One Solution Cell Proliferation Assay (MTS) kit was purchased from Promega (Madison, USA). Dynasore was a kind gift from Dr. Thomas Kirchhausen (Harvard Medical School, Boston, MA). Polyclonal rabbit anti-LRP1 was from Abclonal (Wuhan, China); Monoclonal mouse anti- $\alpha$ -tubulin was from Abcam (Cambridge, UK). HRP-conjugated Affinipure goat anti-mouse and goat anti-rabbit secondary antibodies were

from ProteinTech Group (Chicago, USA). SuperSignal West Femto Maximum Sensitivity Substrate was from Thermo scientific (Waltham, MA, USA).

The 21-nucleotide target sequence of human LRP1 gene (<sup>88</sup>AAGCAGTTTGCCTGCAGAGAT<sup>108</sup>) was used to generate the plasmid encoding shRNA against LRP1 [20]. Dynamin (dyn) mutants, including dyn1K44A and dyn2K44A, were generated by exchanging the nucleotide sequence encoding lysine 44 with a homologous fragment encoding alanine 44. The EGFP-Rab5 plasmid was a kind gift from Dr. Emmanuel Boucrot (MRC Laboratory of Molecular Biology, Cambridge, UK).

### Preparation of A $\beta$ 42 Monomers and Oligomers

Lyophilized HiLyte Fluor555-labeled A $\beta$ 42 was dissolved in 0.1% NH<sub>4</sub>OH to get soluble monomeric A $\beta$ 42 (sA $\beta$ 42) at a concentration of 400  $\mu$ M. Aliquots were either stored at 4°C as sA $\beta$ 42 stocking solution or used for preparing oA $\beta$ 42. The procedure was to dilute the stock sA $\beta$ 42 solution to a concentration of 100  $\mu$ M in 150 mM NaCl buffered at 10 mM Tris (pH 7.4), subsequently 0.1 M HCl was added to adjust the pH to 2.0, and the sample solution was incubated at 37°C for 24 h with mild agitation. The pellets were collected by centrifuging the sample at 12,000 rpm for 20 min and resuspended in PBS to a final concentration of 100  $\mu$ M and stored at 4°C. When used, the working concentration of the peptides was adjusted to 0.4  $\mu$ M. Unlabeled synthetic human amyloid- $\beta$  peptide was identically oligomerized with the above protocol and used for experiments.

### Characterization of Oligomer Preparations

**Electron microscopy.** A $\beta$ 42 oligomers were applied to formvar-coated 300-mesh copper grids for 2 min and excess fluid was filtered off. The samples were then stained with 1% uranyl acetate for 1 min, excess fluid was filtered off and the grids were examined with H-8100 transmission electron microscope (Hitachi, Tokyo, Japan) operated at 150 KV and 32,000 $\times$  magnification.

**ThT fluorescence assay.** The assay was performed according to a standard protocol [21]. A 200  $\mu$ M aqueous Thioflavin T (ThT) was prepared and filtered through 0.22  $\mu$ m filter. For measurement, A $\beta$ 42 samples (monomers or oligomers) were prepared in 10  $\mu$ M ThT/deionized water solution, pH 7.4. Immediately after mixing, ThT fluorescence of samples was measured with the excitation wavelength at 450 nm and emission wavelength at 482 nm with 470 nm cut-off by a Microplate Reader (Molecular Devices, Sunnyvale, CA, USA).

### Cell Culture and Transfection

Human U87 astrocytoma cell was from Dr. Jianmiao Liu's lab, and was grown at 37°C with 5% CO<sub>2</sub> and 100% humidity in DMEM supplemented with 10% FBS, 100 U/ml penicillin and 100  $\mu$ g/ml streptomycin. Transient transfections of plasmids were performed using Lipofectamine 2000 Reagent Kit (Invitrogen) according to the manufacturer's instructions, and cells were examined 24 h after. shRNA transfection was also performed using Lipofectamine 2000, cells were subjected to two successive transfection with 48 h interval. Cells were seeded on glass coverslips 12 h after the second transfection and examined 24 h later. Control cells were treated similarly without addition of shRNA.

### Western Blot, Uptake, and Degradation Assays

**Western blot.** U87 cells were transfected with vehicle or LRP1 specific shRNA. 72 h posttransfection, cells were washed twice in PBS buffer and were lysed in lysis buffer (150 mM sodium

chloride, 1.0% NP-40, 50 mM Tris, pH 8.0, supplemented with protease inhibitor cocktail). Equal amounts of protein of each sample were subjected to SDS-PAGE followed by membrane transfer. Membrane was incubated with appropriate antibodies, developed by enhanced chemiluminescence reagents, and the immunoreactive bands were visualized by autoradiography. For densitometric analyses, immunoreactive bands on films were quantified using ImageJ.

**Uptake.** U87 cells were seeded on coverslips and grown at 37°C overnight in complete medium. Uptake experiments were initiated by incubating cells at 37°C with 0.4 μM HiLyte Fluor555-tagged Aβ42 peptides for 2 h, which were diluted in imaging medium (α-MEM without phenol red supplemented with 20 mM HEPES, pH 7.4, and 5% FBS). Cells were subsequently washed three times with ice-cold PBS, fixed with 3.7% PFA for 20 min and stained with 1 μg/ml DAPI diluted in PBS containing 0.1% saponin for 15 min at room temperature. Then, cells were mounted with a mounting solution containing 50% glycerol and 50% PBS. For endocytosis inhibition experiments, cells were pretreated with various endocytotic inhibitors with indicated times followed by Aβ42 peptides uptake in the presence or absence of these inhibitors.

**Degradation assay.** Cells were incubated in fresh DMEM containing 0.4 μM fluoro-tagged Aβ42 monomers or oligomers for 2 h. After extensively wash, cells were chased in fresh completed medium with indicated times up to 72 hours. Cells were subsequently fixed, stained with DAPI and mounted as described above. Images acquisition and analysis were performed as described below.

### Localization of Internalized Aβ42 within the Endolysosomal System

The trafficking of fluoro-tagged monomeric and oligomeric Aβ42 was measured as follows. To examine the localization in early endosomes, cells were transfected with EGFP-Rab5 plasmid to label early endosomes. 24 h after transfection, cells were treated with Aβ42 peptides for indicated time periods. After changing with the fresh imaging medium, live cell imaging was then taken using a confocal microscope with an objective heater (set at 37°C). To examine the localization of peptides in lysosomes, plain cells were first treated with Aβ42 peptides for indicated time periods, and 30 min before taking imaging, lysotracker Green were supplemented in the incubation medium (50 nM) to label lysosomes. Afterwards, fresh medium was changed and live cell imaging was taken.

### Confocal Microscopy

All the images were obtained by a spinning disk confocal imaging system (CSU-X1 Nipkow Yokogawa, Japan) under the control of Andor IQ 2.7 software attached to an Olympus IX-71 inverted microscope (Olympus Corp., Japan). An oil-immersion objective (60×NA1.45) was used. Three 50 mW solid-state lasers (405 nm, 491 nm, and 561 nm) coupled to an acoustic-optical tunable filter (AOTF) were used as light source to excite DAPI, EGFP, and HiLyte Fluor555. 3D stacks of optical sections spaced 0.2 μm and spanning the complete volume of the cells were acquired. Images were analyzed with ImageJ 1.45 m (Wayne Rasband, National Institutes of Health).

### Data Analysis

**Uptake assays data.** The integrated amount of HiLyte Fluor555-tagged sAβ42 or oAβ42 peptides accumulated within the cell boundaries corrected by background represents the total

uptake of ligands, as described before [22]. Briefly, in most cases, the integrated intracellular signals were determined from a 2D projection image of the fluorescence intensities of a Z-stack lacking the most bottom and top planes as they mostly contain plasma membrane signals. The cell outline in each plane was determined by increasing the brightness of the image. In some cases, bright field images were also taken to help identify the cell outlines. The integrated fluorescence within the cell was background-corrected by subtraction of the fluorescence signal surrounding the cell under analysis and its value was then normalized to the mean (average) of the control cells set to 100. For plain cells in the absence or presence of various pharmacological treatment, all intact cells in each image field were used for quantification of Aβ uptake; for cells transfected with plasmids, only the positively transfected cells were used for quantification of Aβ uptake, which was estimated from the EGFP signal in green channel.

**Degradation assay analysis.** Degradation of the internalized sAβ42 or oAβ42 was examined by calculating the normalized signal at each time point as  $I_i/I_0$ , where  $I_0$  is the intensity taken at time point of 0. Estimation of the half-life and rate constants for degradation of Aβ42 peptides were made by fitting data using a single-phase exponential decay equation (Origin, ver. 6.0).

**Co-localization analysis.** Images were deconvolved using AutoQuant, a 50-pixel-wide rolling-ball subtraction algorithm was subsequently used to remove background noise. The sub-stacks of 3 sections spanning 0.4 μm were generated and imported to ImageJ for analysis. Manders' coefficient was calculated using ImageJ plugin "JACoP". The percentage was scored as the Aβ puncta signals that are positive for EGFP-Rab5 or Lysotracker Green signals with respect to the total number of Aβ puncta.

All data were presented as the mean value ± SEM together with the indicated number of experiments ( $n$ ). Each displayed image was representative of at least three independent experiments.

### Assessment of Cell Viability

Cell viability after treatments with fluoro-tagged sAβ42 or oAβ42 was measured by quantitative colorimetric assay with MTS, as described previously [23]. U87 cells in black 96-well plates at a density of 20,000 cells per well (100 μl) were challenged with sAβ42 or oAβ42 at different concentrations for 24 h or 72 h, and DMSO was used as vehicle control. Cells maintained in the serum free medium without Aβ were used as negative control. Following addition of 20 μl MTS reagent into each well, plates were incubated at 37°C for 4 h. The formazan product was quantified by measuring absorbance at 490 nm with a Microplate Reader (Molecular Devices, Sunnyvale, CA, USA). All the experiments were repeated three times.

## Results

### Preparation and Characterization of sAβ42 and oAβ42

We first prepared homogeneous soluble monomeric Aβ42 (sAβ42), by dissolving the peptide synthetic powder in an NH<sub>3</sub> solution at pH 12 and with minimal sonication [24]. Furthermore, oligomeric Aβ42 (oAβ42) devoid of mature fibrils was prepared from unlabeled and HiLyte Fluor555-labeled synthetic Aβ42 peptides as described [25]. Transmission electron microscopy (TEM) was used to confirm the oAβ42 preparation. As illustrated in Figure 1A, oligomers appeared as short rod-like structures on electron micrographs with an average length of <150 nm and diameters of approximately 5 nm, in accordance with the previously reported sizes of protofibrils [24,26].

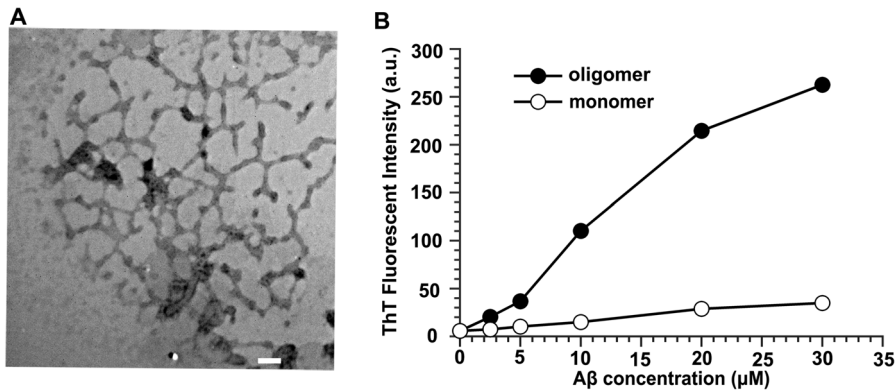

**Figure 1. Characterization of oligomeric Aβ42 preparation.** (A) Transmission electron micrograph (magnified  $\times 32,000$ ) of 100  $\mu\text{M}$  oAβ42. 10  $\mu\text{L}$  of samples were spotted on a glow-discharged, carbon-coated Formavar grid and incubated for 2 min, washed with distilled water, stained with a 1% (w/v) aqueous uranyl acetate solution, and examined using an H-8100 TEM. Scale bar is 100 nm. (B) ThT fluorescence assay of aggregates of Aβ42. a.u., arbitrary unit. doi:10.1371/journal.pone.0099939.g001

The fluorescent dye thioflavin T (ThT) is commonly used to detect the formation of amyloid fibrils due to the increases in ThT fluorescence after specifically interacting with amyloid fibrils. However, a recent research demonstrated that oligomeric Aβ contained nanomolar-affinity binding sites for ThT and its analog and suggested that the widely used ThT fluorescence assay for quantifying Aβ fibrils may detect Aβ oligomers [27]. In this study, we used the standard protocol for the ThT assay to further characterize the prepared sAβ42 and oAβ42 (Figure 1B). ThT only exhibited a basal fluorescence level after titration with monomeric Aβ42 solutions of varying concentrations. However, ThT fluorescence increased in a nearly linear-manner after titration with oligomeric Aβ42 solution with concentrations ranging from 0 to 30  $\mu\text{M}$ , which confirmed that these oligomers bound to ThT. These results indicated the successful preparations of sAβ42 and oAβ42, which we used for subsequent experiments.

#### oAβ42 Versus sAβ42 Uptake by U87 Cells

We used the U87 human brain astrocytoma cell line as a model to study astrocyte uptake of Aβ42 [28]. We first investigated the capability of U87 cells to internalize the monomeric and oligomeric forms of Aβ42. U87 cells were treated with tagged sAβ42 or oAβ42 for the indicated times. After treatment, these cells were washed, fixed, counterstained with DAPI, and observed under a microscope (Figure S1). These results showed that both sAβ42 and oAβ42 were internalized by U87 cells, although the cellular uptake of the latter species appeared to be greater. This was because the average fluorescence intensity of oAβ42 that accumulated within cells was much higher than that of sAβ42, although identical molar concentrations (unit concentration) of these two species were used with U87 cells (results for control in Figure 2; 0.4  $\mu\text{M}$  was used here and for all subsequent internalization experiments). Furthermore, we attempted to identify the mechanistic differences for the astrocyte internalization of sAβ42 and oAβ42.

#### sAβ42 and oAβ42 Internalization by U87 Cells Involves Fluid Phase Macropinocytosis and is Sensitive to Reduced Cellular Cholesterol

The cellular mechanisms by which Aβ peptides are internalized with different aggregation states have not been well characterized. To determine the routes of Aβ entry, U87 cells were first treated with amiloride, which is an  $\text{Na}^+/\text{H}^+$ -inhibitor commonly used to

determine whether the uptake of a particular ligand involves macropinocytosis. Treatment of U87 cells with amiloride significantly reduced their uptake of sAβ42 by 61% and that of oAβ42 by 92%, as determined by internalized fluoro-tagged Aβ42s (Figure 2 A, a–d and B). Furthermore, we examined Aβ42 uptake after treating cells with wortmannin, which blocks phosphoinositide 3-kinase (PI3K) activity. PI3K is required for spontaneous cell surface ruffling, which is an integral part of macropinocytosis. As illustrated in Figure 2A (e–f) and the corresponding histograms, sAβ42 and oAβ42 uptake was reduced by 55% and 37%, respectively.

In addition, we determined the effects of removing cholesterol on the internalization of Aβ42 using methyl-β-cyclodextrin (MβCD). Treating U87 cells with MβCD reduced the internalization of sAβ42 by 46% and that of oAβ42 by 48%, which indicated a requirement for cholesterol (Figure 2 A, g and h). A previous report suggested that MβCD promoted Aβ degradation without interfering with its uptake into microglial cells [29]. However, we noticed that the study used flow cytometry to analyze accumulated fluorescently-labeled Aβ, which may not exclude plasma membrane-deposited fluoro-tagged ligands, and thus overestimate internalization. Although cholesterol has been considered to be associated with caveolae- or lipid raft-mediated endocytosis, a previous report suggested that as an important component of plasma membranes, cholesterol is necessary for most internalization routes because of its participation in forming an appropriate membrane environment and is necessary for membrane ruffling and actin reorganization [30].

#### Dynamin Dependence of Aβ42 Endocytosis by U87 Cells

The results described above reflected the characteristics of sAβ42 and oAβ42 uptake by U87 cells. Furthermore, we explored the dynamin dependence of these processes. The best-studied cellular function of dynamin is its involvement in clathrin-mediated endocytosis. However, dynamin has been implicated in several other membrane-trafficking events, including caveolae-mediated and noncaveolar clathrin-independent endocytic pathways, phagocytosis, macropinocytosis, and trafficking from the *trans*-Golgi network [31]. We first used Dynasore, a fast-acting, cell-permeable, small molecule to inhibit dynamin GTPases (Dyn1 and Dyn2) before incubating cells with Aβ42 peptides [32]. The internalization of sAβ42 and oAβ42 was strongly blocked after Dynasore treatment (Figure 3A, a–f). Only sparse fluoro-sAβ42

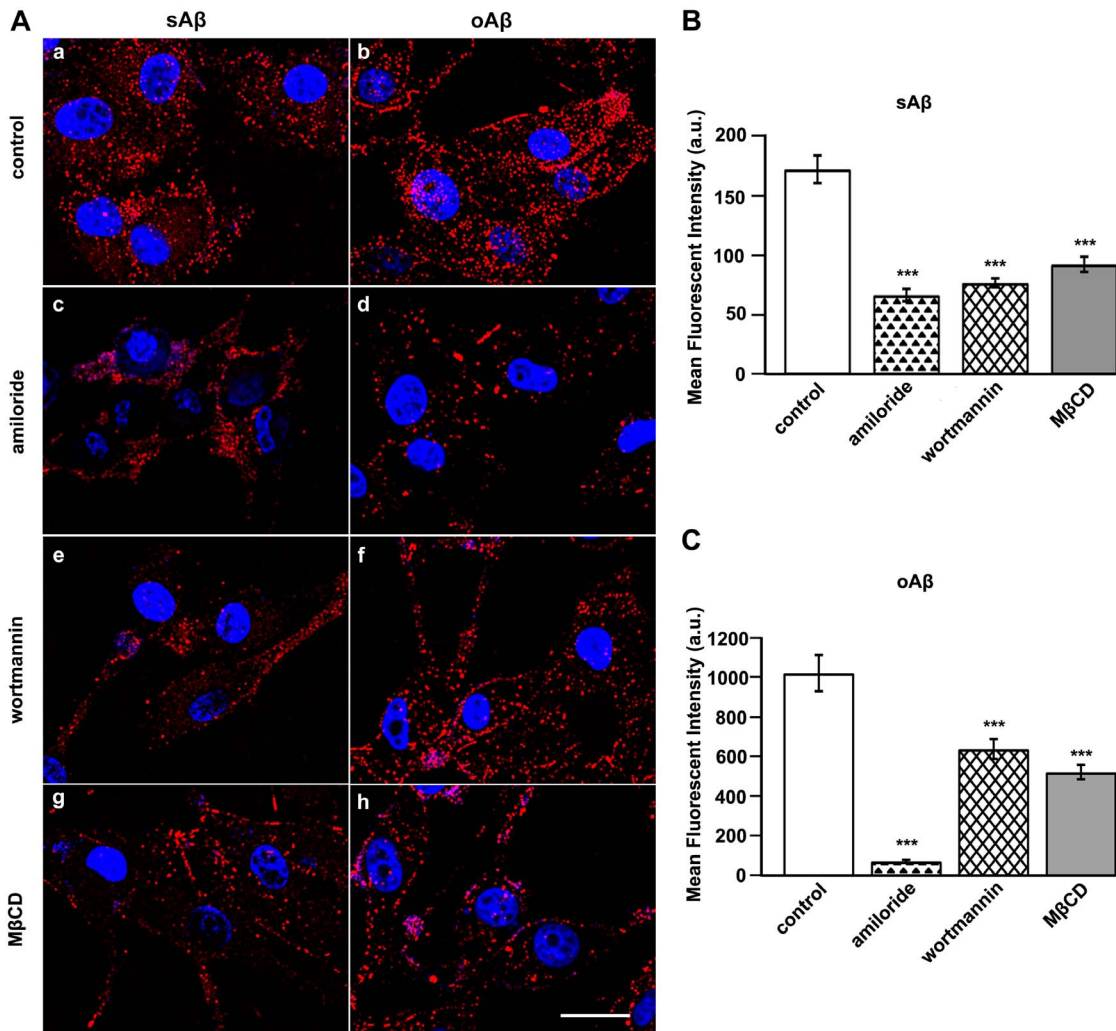

**Figure 2. Characterization of sAβ42 and oAβ42 internalization by U87 cells.** (A) Representative fluorescent photomicrographs showing the uptake of sAβ42 or oAβ42 by U87 cells that were treated with vehicle, amiloride, wortmannin, or MβCD. U87 cells were pretreated in the absence or presence of 5 mM amiloride for 30 min, 300 nM wortmannin for 1 h, and 1 mM MβCD for 30 min, respectively, followed by incubation with 0.4 μM sAβ42 or oAβ42 for 2 h at 37°C. Subsequently, cells were fixed and analyzed using confocal microscopy for uptake of each Aβ42 as indicated. Nuclei (blue) were stained with DAPI. Scale bar is 20 μm. (B, C) Quantitation of internalized fluorescence-conjugated sAβ42 (B) or oAβ42 (C) in U87 cells based on fluorescence intensity measurements. Values obtained from drug-treated cells were compared to those from mock-treated cells under similar conditions. Results represented the average ± SEM of >25 cells measured in each of three independent experiments. \*\*\*p<0.001, t-test. doi:10.1371/journal.pone.0099939.g002

punctate fluorescence was observed within these cells, and plasma membrane-deposited fluoro-sAβ42 indicated that surface-bound sAβ42 could not be transported into these cell. Furthermore, oAβ42 entry was almost entirely blocked, as more fluoro-oAβ42 molecules accumulated around the plasma membrane and no punctate fluorescence was observed in these cells (Figure 3A, e–f). Quantifying the fluorescence intensity results confirmed the inhibition of both Aβ42 peptides from being taken up into U87 cells and suggested an essential role for dynamin in their endocytosis (Figure 3B and C).

Mammals express three Dyn isoforms in a tissue-specific manner. Dynamin 1 (Dyn1) is neuron-specific, dynamin 2 (Dyn2) is ubiquitously expressed, and dynamin 3 (Dyn 3) is exclusively expressed in the testis, lung, and brain. This suggests that distinct isoforms may mediate specific cellular functions [33]. To test the dependence of Aβ species endocytosis on Dyn isoforms, we examined the inhibitory effects of Dyn1 and Dyn2 GTPase mutants. Expression of a Dyn 1 dominant-negative K44A mutant

had no effect on the uptake of sAβ42 or oAβ42, whereas a Dyn 2 K44A mutant effectively inhibited the internalization of both Aβ42 species by U87 cells (Figure 3A, g–n). Quantitative fluorescence intensity results showed that about 53% of sAβ42 and 72% of oAβ42 uptake was reduced (Figure 3B and C). These findings suggested that Dyn2 function was required for the macropinocytotic internalization of Aβ42 species in U87 cells.

### LRP1 is Differentially Involved in the Clearance of Extracellular Monomeric and Oligomeric Aβ42 by U87 Cells

The low-density lipoprotein receptor (LDLR) family of receptors is proteins that have similar structural characteristics and have various important endocytic and signaling functions. Members of this family include LDLR, LRP1, LRP2, very-low density lipoprotein receptor (VLDLR), and apolipoprotein E receptor 2 (ApoER2) [34]. LDLR/LRP1 involvement in Aβ internalization



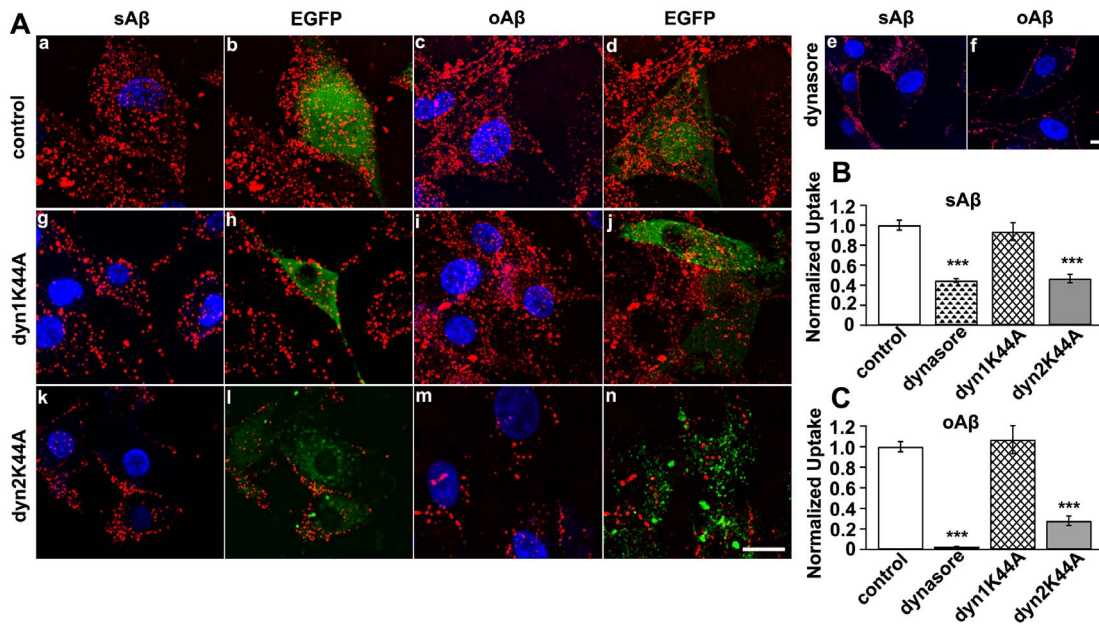

**Figure 3. Dynamin 2 participated in Aβ42 uptake by U87 cells.** (A) The uptake of Aβ42 species by U87 cells were affected by Dynasore and dominant-negative dynamin2. U87 cells were transfected with an empty vector (a–d), pre-treated with dynasore (e, f) or transfected with GFP-tagged Dyn K44A variants (g–n) followed by incubation with sAβ42 or oAβ42 for 2 h at 37°C. Subsequently, cells were fixed and analyzed uptake of each Aβ42 using confocal microscopy as indicated. Nuclei (blue) were stained with DAPI. Scale bar is 20 μm. (B, C) Quantification of internalized fluorescence-conjugated sAβ42 (B) or oAβ42 (C) in U87 cells based on fluorescence intensity measurements. Values obtained from dynasore-treated or Dyn K44A-expressing cells were normalized to those from mock-treated cells or mock-transfected cells under similar conditions. Results represented the average ± SEM of >25 cells measured in each of three independent experiments. \*\*\*p<0.001, t-test. doi:10.1371/journal.pone.0099939.g003

by astrocytes is controversial, in that previous studies did not examine Aβ internalization by astrocytes [4]. Thus, we investigated how altering LRP1 levels might affect the uptake of Aβ into U87 cells.

U87 cells were transfected with either a vehicle control or LRP1-targeted shRNA and used for analysis 72 h after transfection. The production of LRP1 protein was knocked down to 42%, as confirmed by Western blotting (Figure 4A and A'). When LRP1-suppressed U87 cells were treated with fluoro-tagged Aβ42 peptides for 2 h at 37°C, sAβ42 internalization was reduced by about 55% of that in control cells, while a less reduction (30%) in oAβ42 internalization was detected under these conditions (Figure 4B–D). LRP1 involvement in the uptake of sAβ by neural and nonneural cells has been extensively investigated, whereas whether there are any Aβ receptors that mediate these oligomers internalization in neural cells is debatable. Taken together, our results indicate that in U87 cells, although monomeric and oligomeric Aβ42 shared some common properties in their endocytic pathways, oligomers have a priority for entry, which we speculate maybe related to their different dependence on LRP1 receptors.

**Internalized sAβ42 and oAβ42 are Rapidly Transported to Lysosomes through an Endolytic Pathway in U87 Cells**

Previous work with microglial cells proposed that sAβ42 was transferred to late endosomes and lysosomes by a direct fusion of the macropinocytic vesicles to these late endolytic vesicles [11]. We examined the dynamic subcellular destinations of sAβ42 and oAβ42 peptides after their uptake to observe the trafficking routes. U87 cells were treated for the indicated times with fluoro-tagged Aβ42 peptides (Figure 5 and Figure S2–S5). Using EGFP-Rab5 as an early endosome marker, we observed that the fractions of both

peptides in classical early endosomes were constantly very low (Figure S2 and S3 and Figure 5C), indicating most of the Aβ42 peptides did not transit through the early endosomes. However, the fraction of sAβ42 and oAβ42 localized to vesicles that were positive for LysoTracker Green staining increased with prolonged Aβ42 treating time (Figure S4 and S5 and Figure 5D), which suggested their trafficking to lysosomes. Taken together, these data suggested that after endocytosis, both sAβ42 and oAβ42 species were transferred to the lysosome compartments most probably by direct fusion of vesicles to the late endolytic compartments.

**Fluorescently Labeled sAβ42 and oAβ42 are Subjected to Proteolysis by Lysosomes in U87 Cells**

Using fluorescently-labeled monomeric and oligomeric Aβ42 peptides, we examined their internalization and intracellular trafficking in U87 cells. This showed that both species were actively taken up and rapidly accumulated within lysosomes. Furthermore, we examined whether the accumulated Aβ species were subjected to proteolysis in the lysosomes of U87 cells. Cells were first incubated with 0.4 μM fluoro-tagged sAβ42 or oAβ42 for 2 h, after which the medium was replaced with fresh DMEM. After chasing for different times, cells were fixed and microscopically monitored for their intracellular levels of Aβ species (Figure 6A and B). The representative photomicrographs in Figure 6A illustrate an obvious decrease in intracellularly accumulated punctate fluorescence for both Aβ42 peptides 12 h postwashout of these cells. By quantifying the average integrated fluoro-Aβ42 peptides in cells, 14% of sAβ42 and 38% of oAβ42 remained at this time, which indicated the rapid clearance capability of U87 cells for both Aβ species (Figure 6B). In addition, we examined the time courses for degradation of both Aβ species by extending the chasing time after internalization of

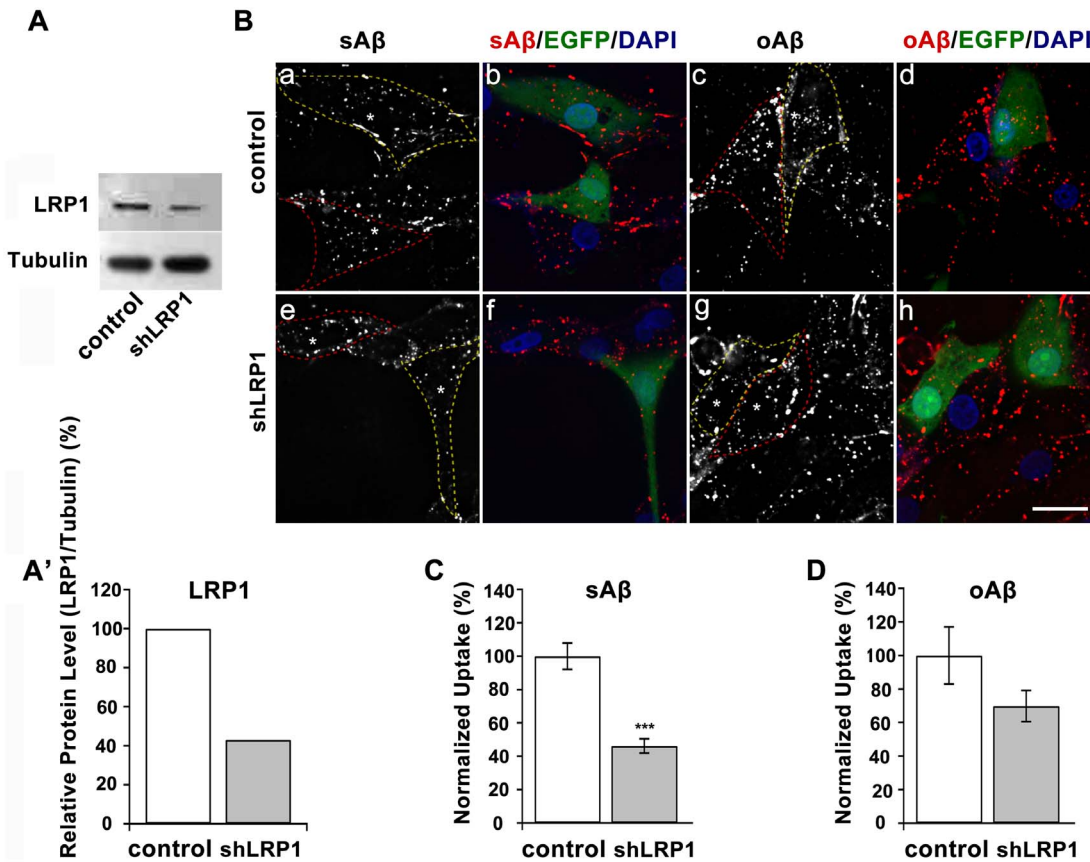

**Figure 4. LRP1 receptor dependence of Aβ42 internalization by U87 astrocytic cells.** (A, A') Knockdown of LRP1 levels in U87 cells were measured by immunoblot. Tubulin served as a loading control. (B) Fluorescent micrographs of U87 cells treated with EGFP-tagged vehicle or LRP1 shRNA for 72 h. Cells were incubated with fluorescence-conjugated sAβ42 or oAβ42 for 2 h at 37°C. DAPI was used to stain nuclei. Images were taken by confocal microscopy. Cell contours were outlined for plasmids-expressing positive (yellow dash line) and negative (red dash line) cells, respectively, and asterisks show the nuclei. Scale bar is 20 μm. (C, D) Quantitation of internalized fluorescence-conjugated sAβ42 (C) or oAβ42 (D) in U87 cells after treatment with shLRP1 based on fluorescence intensity measurements. Results represented the average ± SEM, n>23. \*\*\*p<0.001, t-test.

doi:10.1371/journal.pone.0099939.g004

the Aβ peptides. We observed that at earlier stages (up to 48 h), oAβ42 degraded much slower than sAβ42 by U87 cells, while both species were ultimately efficiently proteolyzed, with sAβ42 remaining of about 8% and oAβ42 remaining of about 5% 72 h after internalization. As shown in Figure 6B, the degradation of both Aβ42 peptides in U87 cells were consistent with a first-order decay process. By fitting data using a single-phase exponential decay equation, the rate-constants are 0.258 h<sup>-1</sup> for sAβ42 and 0.083 h<sup>-1</sup> for oAβ42, respectively. The half-times (t<sub>0.5</sub>) for sAβ42 and oAβ42 were calculated to be 2.68 h and 8.31 h, respectively.

It has been suggested that Aβ42, the principal Aβ species in senile plaques, once internalized into neurons, can accumulate within the endosomal-lysosomal system as insoluble aggregates and subsequently trigger neuronal death by compromising lysosomal membrane impermeability [35]. Thus, we examined the effect of Aβ42 on U87 cell viability. Cells were incubated with sAβ42 or oAβ42 and cell viability was determined by MTS assay. Untreated cells were used as a negative control. These results showed that U87 cell growth was not inhibited by either Aβ42 species, even after 72 h (Figure 6C).

Wang *et al.* reported that, as different from the neural cell line SH-SY5Y, astrocytic U87 cells were not induced to undergo apoptosis, even after treatment with 20 μM Aβ, but their viability did decrease because of autophagic cell death [36]. We assumed

that U87 cells tolerated the toxic effects of Aβ42 species better than the neurons, particularly because we used relatively low concentrations of Aβ peptides, which could be rapidly cleared by U87 cells and produced negligible cellular toxicity. This property assigns a neuronal protection role to astrocytes because they can promptly clear Aβ peptides from the extracellular milieu, which subsequently maintains the dynamic Aβ balance, also In addition, this suggests an attractive therapeutic target by promoting astroglial Aβ endocytosis and degradation.

## Discussion

Aβ has attracted considerable interest in the field of AD research. Its effects at the cellular level and within the nervous system have been pressing issues for those attempting to develop diagnostic and therapeutic approaches. Vaccines to enhance Aβ clearance are currently under investigation in several clinical trials [37]. However, the mechanisms underlying constitutive and enhanced clearance have not been completely elucidated.

Several pathways for Aβ clearance have been suggested, including (1) Aβ clearance through the blood-brain barrier, (2) extracellular degradation by proteolytic enzymes, and (3) Aβ uptake and degradation by glial cells. Wyss-Coray *et al.* [38] provided direct evidence for a role by astrocytes in Aβ degradation

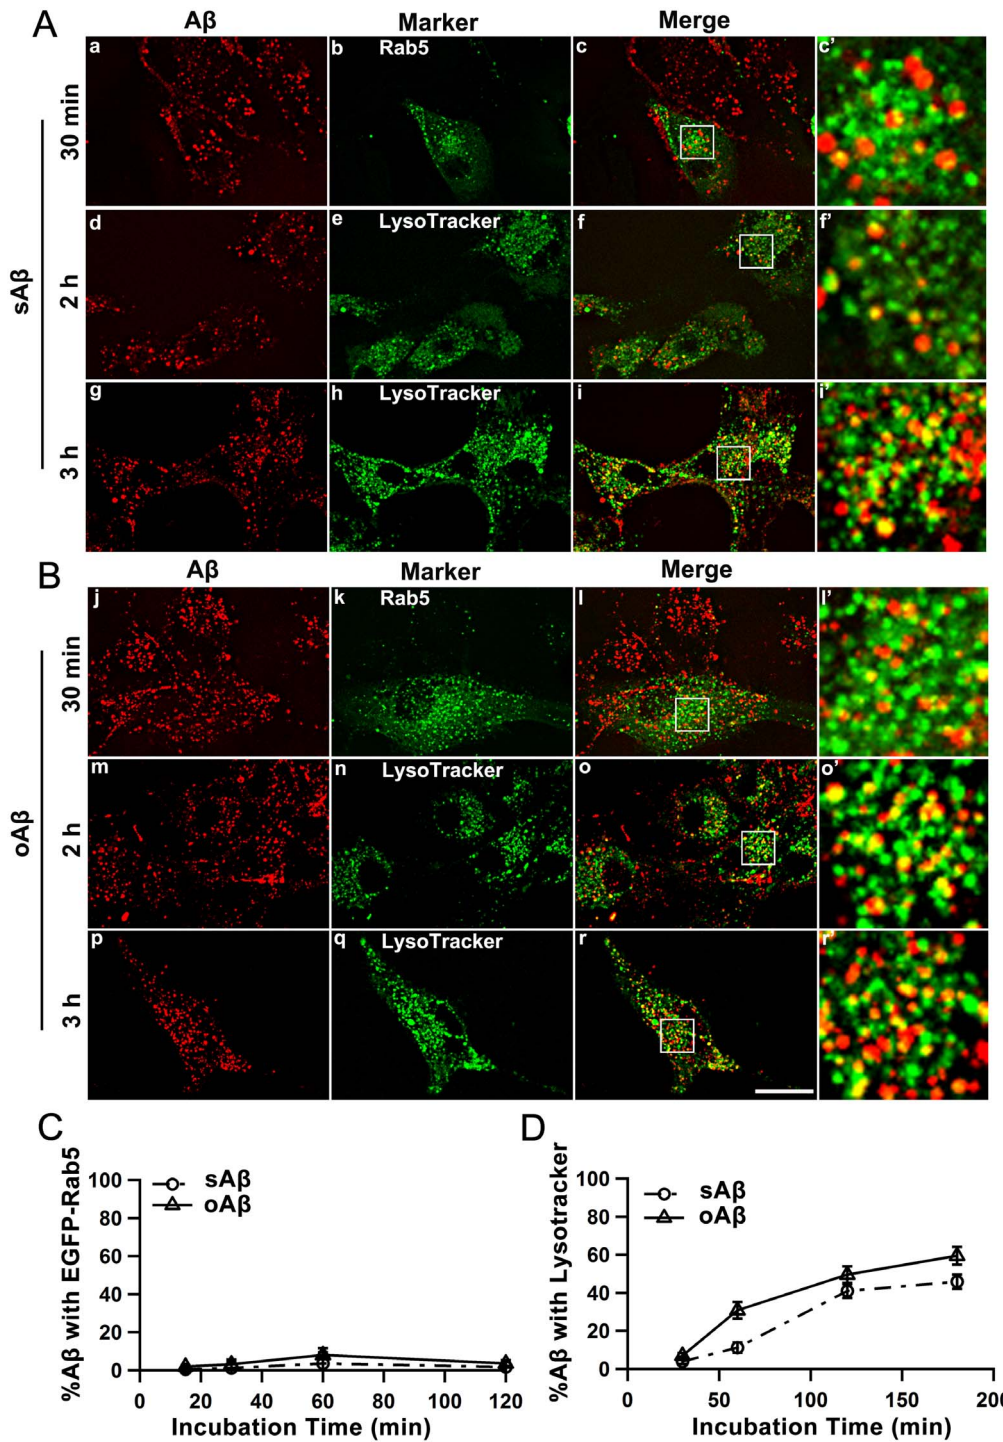

**Figure 5. Internalized Aβ42 peptides were rapidly transported to lysosomes through an endolytic pathway.** U87 cells were transfected with EGFP-Rab5 to mark early endosomes (a–c and j–l) or stained with LysoTracker Green to mark lysosomes (d–i and m–r). Cells were incubated with 0.4 μM sAβ42 (A) or oAβ42 (B) for various durations and live-cell images were taken by confocal microscopy. Scale bar is 20 μm. (C, D) Quantification of the Aβ42 peptides transport over time. The percentages of colocalization of Aβ42 peptides with EGFP-Rab5 (C) and LysoTracker Green (D) were analyzed and plotted. The error bars represent the average ± SEM of n>15 cells (C) and >25 cells (D). doi:10.1371/journal.pone.0099939.g005

and suggested that there were defects in astroglial clearance of Aβ in AD pathogenesis. This suggested that treatments that increased the removal of Aβ by astrocytes may be a means to reduce the neurodegeneration associated with AD. However, compared with neurons and microglial cells, our understanding of human

astrocyte-mediated Aβ internalization and consequences is limited. Our study results should aid in understanding the physiological mechanisms underlying astrocyte clearance of toxic Aβ with different aggregation states.



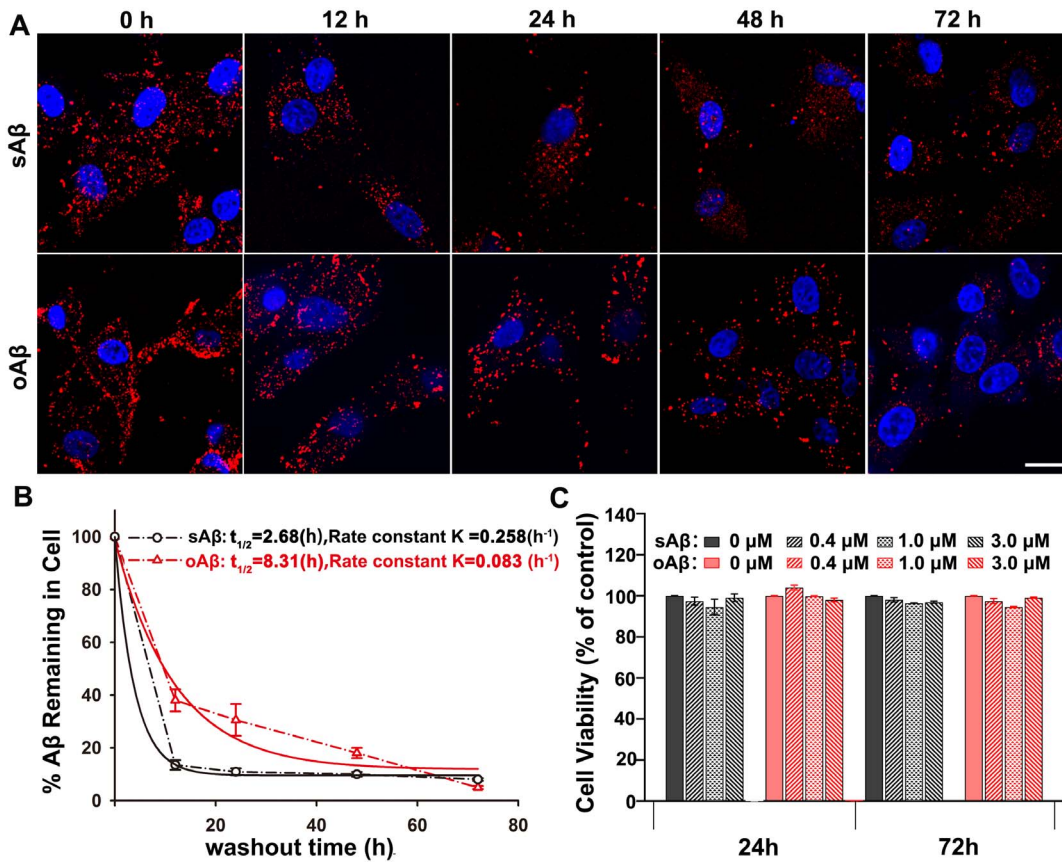

**Figure 6. Fluoro-tagged Aβ42s were proteolytically degraded by U87 cells without inhibitory effects on cell growth.** (A, B) The degradation of labeled sAβ42 or oAβ42 peptides in U87 cells was examined using fluorescence microscopy. Cells were allowed to internalize 0.4 μM Aβ42 species for 2 h, followed by washing out and incubation for additional various durations in medium lacking Aβ42. (A) Representative images of the intracellularly accumulated HiLyte Fluor555-labeled sAβ42 or oAβ42 at different checking time points. Nuclei (blue) were stained with DAPI. Scale bar is 20 μm. (B) The remaining of sAβ42 and oAβ42 at different time points after internalization into U87 cells were plotted. The time points were corresponded to those in (A). The values were obtained by quantifying the remaining average fluorescence intensity of HiLyte Fluor555-labeled sAβ42 or oAβ42 at different time point, relative to that at t=0 h, and were calculated based on the representative images shown in (A). The data were fitted with the exponential decay curves. Results represented the average ± SEM. At least 8 cells from 3 independent experiments were used to calculate for each time-point. (C) U87 cells were treated with sAβ42 or oAβ42 of indicated concentration for 24 h or 72 h, and cell viability was measured by MTS. The mean of three analyses was shown. No significant differences were detected for each condition. P≥0.01, t-test. doi:10.1371/journal.pone.0099939.g006

**Mechanisms of Aβ Internalization in Neurons and Glial Cells**

Similar to numerous other cell types, neurons have several major endocytic pathways, including clathrin-dependent, caveolae-dependent, and noncaveolar clathrin-independent pathways. Until recently, clathrin-mediated endocytosis [35,39] was considered to be the major mechanism of Aβ internalization. However, several other clathrin-independent processes that may mediate Aβ uptake, such as nonsaturable and nonendocytotic uptake, dynamin-dependent and cholesterol-sensitive pathways [40,41], dynamin-mediated and RhoA-regulated process [42], have been proposed. In addition, microglial cells have been reported to mediate the clearance of fibrillar Aβ through receptor-mediated phagocytosis [9] and can internalize sAβ through a fluid phase macropinocytic mechanism [11].

Previous studies on astroglial cells mainly focused on their mediation of neuronal-glia interactions and the endocytic pathways in astroglial cells are poorly understood [43]. There has been little work done on the internalization pathways for Aβ entry into astrocytes. In this study, we systematically characterized the internalization pathways for the entry of sAβ42 and oAβ42

into U87 cells. We confirmed that a clathrin-independent macropinocytic pathway was responsible for the uptake of both peptides by U87 cells. The capacity of U87 cells to internalize oAβ exceeded that for sAβ, which suggested the importance to clear primary aggregated Aβ (oAβ) by astroglial cells and subsequently protect neurons. We observed that the dynamin 2 and not the dynamin 1 isoform played an important role of clipping away endocytic vesicles from the astroglial cell plasma membrane.

A number of candidate receptors have been suggested to regulate soluble and fibrillar Aβ clearance by microglial cells, including scavenger receptors, Toll-like receptors, and others [44]. However, the cell receptors that facilitate Aβ uptake and clearance by astrocytes have not been extensively characterized. Previous results suggested that Aβ clearance by astrocytes required both apoE and an unknown receptor from the LDLR family. Basak *et al.* [45] highlighted the importance of LDLR in regulating the uptake and clearance of soluble Aβ by astrocytes. LRP1, which is another important member of the LDLR family, has been shown to mediate the metabolism of Aβ in neurons and brain vessels [39,46]. However, no study has directly determined whether LRP1 is involved in Aβ uptake and degradation in astrocytes.

In our current study, we assessed the effects of down-regulating LRP1 expression by shRNA on astrocytes internalization of sA $\beta$ 42 and oA $\beta$ 42. Our results suggest that LRP1 mediates the association of sA $\beta$ 42 with the cell surface, after which these complexes are internalized into cells through a clathrin-independent macropinocytic pathway. However, the internalization of oA $\beta$ 42 peptides by U87 cells notably appeared to be unaffected by LRP1 knockdown. A recent report [47] emphasized that only soluble, untreated A $\beta$ 42 but not aggregated or oligomeric A $\beta$ , increased apoE protein levels in mouse primary astrocytes, which implied that apoE may mediate a different LRP1 dependence for sA $\beta$ 42 and oA $\beta$ 42 internalization in astrocytes. Additional work will be necessary to identify whether there are specific receptors for oA $\beta$ 42 binding in astrocytes. We speculate that the distinct involvement of receptors may determine the different internalization capacities by astrocytes for sA $\beta$  and oA $\beta$ .

There is increasing evidence for clathrin- and caveolin-independent pathways for mediating ligand-induced endocytosis. The large GTPase dynamin is involved in both clathrin-dependent and -independent pathways. Our results not only enhance our understanding of the mechanisms underlying A $\beta$  peptides internalization by astroglial cells, but also provide support for dynamin involvement in clathrin-independent macropinocytosis, which may be cell type-dependent.

### Consequences of Internalized A $\beta$ , Associated Cell Death, and Dysfunction in Neurons and Glial Cells

sA $\beta$  peptides can be dynamically internalized by cells in the CNS. However, the consequences of the internalized A $\beta$  in distinct neurons are different. In neurons, although internalized A $\beta$  is transported within the endosomal system to multivesicular bodies (MVBs) or lysosomes, A $\beta$  is poorly degraded, which may be because of the formation of protease resistant aggregates. Intraneuronal accumulated A $\beta$  has dramatic consequences, such as causing mitochondrial dysfunction or loss of lysosomal membrane impermeability, and leakage of lysosome contents, which eventually cause neuronal apoptosis and necrosis [48,49]. Abnormal endosomes have been detected in Down syndrome and Niemann-Pick type C in which A $\beta$  peptides intracellularly accumulate [50].

Because microglial cells function as tissue macrophages in the brain and are primary immune effectors within the CNS, they are responsible for fibrillar A $\beta$  clearance. Mandrekar *et al.* [11] reported that microglial cells internalized sA $\beta$  peptides; however, they bypassed early endosomes and were rapidly trafficked into late endolysosomal compartments where they were subject to degradation. The capacity for oA $\beta$  uptake and degradation by microglial cells was unknown. To the best of our knowledge, our study is the first to examine the intracellular itineraries of monomeric and oligomeric A $\beta$ 42 peptides after their uptake by U87 astrocytic cells. We showed that both species were rapidly transferred to lysosomes through an endolytic pathway, most probably bypass the early endosomes. Even at 12 h postinternalization, U87 cells evidently exhibited decreased fluoro-sA $\beta$ 42 and -oA $\beta$ 42 levels in our imaging experiments, which indicated that A $\beta$ 42 degradation was extremely efficient. In particular, this was the case for monomeric peptides. For the oligomers, it is tempting to speculate that the preference of U87 cells for oligomeric A $\beta$ 42 results in a relatively high concentration of peptides in lysosomes. This may delay their initial degradation, although this does not attenuate their ultimate thorough degradation.

In addition, we did not observe any obvious reductions in cell viability. This was different from what has been observed with neurons but similar to what is viewed with microglial cells. Thus,

we speculate that this is because of the distinct destinies of lysosome accumulated A $\beta$ s in different cell types. However, the concentrations of oligomeric A $\beta$  that we used were extremely close to those at physiological conditions, i.e., nanomolar concentrations based on previous reports [51,52] and not on high concentrations (>10  $\mu$ M) used in other reports. Our data further suggest that astrocytes play an important role in the clearance of the normally produced aggregates of A $\beta$  so as to maintain A $\beta$  steady-state in the normal brain.

In conclusion, we believe that dissecting the molecular pathways responsible for A $\beta$  internalization by astrocytes, and the mechanisms involved in their proteolytic degradation will suggest new therapeutic strategies for the effective clearance of brain A $\beta$ .

### Supporting Information

**Figure S1** U87 cells were incubated with HiLyte Fluor555-labeled sA $\beta$ 42 to screen optimal experimental conditions. (A) U87 cells were incubated with 5  $\mu$ M sA $\beta$ 42 for various durations at 37°C. Cells were then fixed and uptake of sA $\beta$ 42 was analyzed by confocal microscopy. Nuclei (blue) were stained with DAPI. Results showed that at earlier stages, such as at 5 min, most of the molecules just bound and accumulated around the plasma membrane, while along longer duration of incubation, sA $\beta$ 42s were eventually internalized into cells. (B) The effect of A $\beta$ 42 concentration on internalization was further examined. Results showed that even at 0.4  $\mu$ M, a submicromolar concentration, the intracellularly accumulated sA $\beta$ 42s were obvious, while at higher concentrations, these molecules probably tend to aggregate. We finally set the concentration to be 0.4  $\mu$ M and the incubation time to be 2 h for all subsequent internalization experiments. Scale bar is 20  $\mu$ m.

(TIF)

**Figure S2** Internalized sA $\beta$ 42 was not transported through early endosome. U87 cells were transfected with EGFP-Rab5, a marker of early endosomes, and incubated with 0.4  $\mu$ M sA $\beta$ 42 for 15 min, 30 min, 1 h, or 2 h, respectively. Live-cell images were taken by confocal microscopy. The images showed that a low fraction of sA $\beta$ 42 was transported into early endosome after internalization. Scale bar is 20  $\mu$ m.

(TIF)

**Figure S3** Internalized oA $\beta$ 42 was not transported through early endosome. U87 cells were transfected with EGFP-Rab5, which marked early endosomes, and incubated with 0.4  $\mu$ M oA $\beta$ 42 for 15 min, 30 min, 1 h or 2 h, respectively. Live-cell images were taken by confocal microscopy. The images indicated that a low fraction of oA $\beta$ 42 passed through the early endosome after internalization. Scale bar is 20  $\mu$ m.

(TIF)

**Figure S4** After internalization, sA $\beta$ 42 was rapidly transported to lysosomes. U87 cells were incubated with 0.4  $\mu$ M sA $\beta$ 42 for 30 min, 1 h, 2 h, or 3 h, respectively, and stained with LysoTracker Green to mark lysosomes. Live-cell images were taken by confocal microscopy. As shown, very little amount of sA $\beta$ 42 were localized to lysosomes at the time point of 30 min, while these molecules accumulated into lysosomes eventually. Scale bar is 20  $\mu$ m.

(TIF)

**Figure S5** oA $\beta$ 42 was rapidly transported to lysosomes after internalization. U87 cells were incubated with 0.4  $\mu$ M oA $\beta$ 42 for 30 min, 1 h, 2 h, or 3 h, respectively, and stained with LysoTracker Green to mark lysosomes. Live-cell images were taken by confocal microscopy. As shown, very little amount of

$\alpha\beta 42$  were localized to lysosomes at the time point of 30 min, while these molecules accumulated into lysosomes eventually. Scale bar is 20  $\mu\text{m}$ . (TIF)

## Acknowledgments

We thank Dr. XN Jiang (Huazhong University of Science and Technology, China) for her help carefully reading the manuscript.

## References

- Hardy J, Selkoe DJ (2002) The amyloid hypothesis of Alzheimer's disease: progress and problems on the road to therapeutics. *Science* 297: 353–356.
- Zhou XF, Wang YJ (2011) The p75<sup>NTR</sup> extracellular domain: a potential molecule regulating the solubility and removal of amyloid-beta. *Prion* 5: 161–163.
- Wang YJ, Zhou HD, Zhou XF (2006) Clearance of amyloid-beta in Alzheimer's disease: progress, problems and perspectives. *Drug Discov Today* 11: 931–938.
- Mohamed A, Posse de Chaves E (2011) Abeta internalization by neurons and glia. *Int J Alzheimers Dis* 2011: 127984.
- Cleary JP, Walsh DM, Hofmeister JJ, Shankar GM, Kuskowski MA, et al. (2005) Natural oligomers of the amyloid-beta protein specifically disrupt cognitive function. *Nat Neurosci* 8: 79–84.
- Evans NA, Facci L, Owen DE, Soden PE, Burbidge SA, et al. (2008) Abeta(1–42) reduces synapse number and inhibits neurite outgrowth in primary cortical and hippocampal neurons: a quantitative analysis. *J Neurosci Methods* 175: 96–103.
- Kittelberger KA, Piazza F, Tesco G, Reijmers LG (2012) Natural amyloid-beta oligomers acutely impair the formation of a contextual fear memory in mice. *PLoS One* 7: e29940.
- LaFerla FM, Green KN, Oddo S (2007) Intracellular amyloid-beta in Alzheimer's disease. *Nat Rev Neurosci* 8: 499–509.
- Koenigsnecht J, Landreth G (2004) Microglial phagocytosis of fibrillar beta-amyloid through a beta1 integrin-dependent mechanism. *J Neurosci* 24: 9838–9846.
- Kong Y, Ruan L, Qian L, Liu X, Le Y (2010) Norepinephrine promotes microglia to uptake and degrade amyloid beta peptide through upregulation of mouse formyl peptide receptor 2 and induction of insulin-degrading enzyme. *J Neurosci* 30: 11848–11857.
- Mandrekar S, Jiang Q, Lee CY, Koenigsnecht-Talboo J, Holtzman DM, et al. (2009) Microglia mediate the clearance of soluble Abeta through fluid phase macropinocytosis. *J Neurosci* 29: 4252–4262.
- Wyss-Coray T, Lin C, Yan F, Yu GQ, Rohde M, et al. (2001) TGF-beta1 promotes microglial amyloid-beta clearance and reduces plaque burden in transgenic mice. *Nat Med* 7: 612–618.
- Chung H, Brazil MI, Soe TT, Maxfield FR (1999) Uptake, degradation, and release of fibrillar and soluble forms of Alzheimer's amyloid beta-peptide by microglial cells. *J Biol Chem* 274: 32301–32308.
- Nielsen HM, Veerhuis R, Holmqvist B, Janciauskiene S (2009) Binding and uptake of A beta(1–42) by primary human astrocytes in vitro. *Glia* 57: 978–988.
- Nielsen HM, Mulder SD, Belien JA, Musters RJ, Eikelenboom P, et al. (2010) Astrocytic A beta(1–42) uptake is determined by A beta-aggregation state and the presence of amyloid-associated proteins. *Glia* 58: 1235–1246.
- Mulder SD, Veerhuis R, Blankenstein MA, Nielsen HM (2012) The effect of amyloid associated proteins on the expression of genes involved in amyloid-beta clearance by adult human astrocytes. *Exp Neurol* 233: 373–379.
- Larson ME, Lesne SE (2012) Soluble Abeta oligomer production and toxicity. *J Neurochem* 120 Suppl 1: 125–139.
- Tabira T, Chui DH, Kuroda S (2002) Significance of intracellular Abeta42 accumulation in Alzheimer's disease. *Front Biosci* 7: a44–49.
- Aoki M, Volkman I, Tjernberg LO, Wimblad B, Bogdanovic N (2008) Amyloid beta-peptide levels in laser capture microdissected cornu ammonis 1 pyramidal neurons of Alzheimer's brain. *Neuroreport* 19: 1085–1089.
- Li Y, Lu W, Bu G (2003) Essential role of the low density lipoprotein receptor-related protein in vascular smooth muscle cell migration. *FEBS Lett* 555: 346–350.
- Yang F Jr, Zhang M, Zhou BR, Chen J, Liang Y (2006) Oleic acid inhibits amyloid formation of the intermediate of alpha-lactalbumin at moderately acidic pH. *J Mol Biol* 362: 821–834.
- Boucrot E, Saffarian S, Zhang R, Kirchhausen T (2010) Roles of AP-2 in clathrin-mediated endocytosis. *PLoS One* 5: e10597.
- Wang P, Henning SM, Heber D (2010) Limitations of MTT and MTS-based assays for measurement of antiproliferative activity of green tea polyphenols. *PLoS One* 5: e10202.
- Benseny-Cases N, Klementieva O, Cladera J (2012) In vitro Oligomerization and Fibrillogenesis of Amyloid-beta Peptides. *Subcell Biochem* 65: 53–74.
- Stine WB, Jungbauer L, Yu C, LaDu MJ (2011) Preparing synthetic Abeta in different aggregation states. *Methods Mol Biol* 670: 13–32.
- Hartley DM, Walsh DM, Ye CP, Diehl T, Vasquez S, et al. (1999) Protofibrillar intermediates of amyloid beta-protein induce acute electrophysiological changes and progressive neurotoxicity in cortical neurons. *J Neurosci* 19: 8876–8884.
- Maczawa I, Hong HS, Liu R, Wu CY, Cheng RH, et al. (2008) Congo red and thioflavin-T analogs detect Abeta oligomers. *J Neurochem* 104: 457–468.
- Kanekiyo T, Bu G (2009) Receptor-associated protein interacts with amyloid-beta peptide and promotes its cellular uptake. *J Biol Chem* 284: 33352–33359.
- Lee CY, Tse W, Smith JD, Landreth GE (2012) Apolipoprotein E promotes beta-amyloid trafficking and degradation by modulating microglial cholesterol levels. *J Biol Chem* 287: 2032–2044.
- Pichler H, Riezman H (2004) Where sterols are required for endocytosis. *Biochim Biophys Acta* 1666: 51–61.
- Liu YW, Surka MC, Schroeter T, Lukiyanchuk V, Schmid SL (2008) Isoform and splice-variant specific functions of dynamin-2 revealed by analysis of conditional knock-out cells. *Mol Biol Cell* 19: 5347–5359.
- Macia E, Ehrlich M, Massol R, Boucrot E, Brunner C, et al. (2006) Dynasore, a cell-permeable inhibitor of dynamin. *Dev Cell* 10: 839–850.
- Urrutia R, Henley JR, Cook T, McNiven MA (1997) The dynamins: redundant or distinct functions for an expanding family of related GTPases? *Proc Natl Acad Sci U S A* 94: 377–384.
- Herz J, Bock HH (2002) Lipoprotein receptors in the nervous system. *Annu Rev Biochem* 71: 405–434.
- Song MS, Baker GB, Todd KG, Kar S (2011) Inhibition of beta-amyloid 1–42 internalization attenuates neuronal death by stabilizing the endosomal-lysosomal system in rat cortical cultured neurons. *Neuroscience* 178: 181–188.
- Wang H, Ma J, Tan Y, Wang Z, Sheng C, et al. (2010) Amyloid-beta(1–42) induces reactive oxygen species-mediated autophagic cell death in U87 and SH-SY5Y cells. *J Alzheimers Dis* 21: 597–610.
- Foster JK, Verdile G, Bates KA, Martins RN (2009) Immunization in Alzheimer's disease: naive hope or realistic clinical potential? *Mol Psychiatry* 14: 239–251.
- Wyss-Coray T, Loike JD, Brionne TC, Lu E, Anankov R, et al. (2003) Adult mouse astrocytes degrade amyloid-beta in vitro and in situ. *Nat Med* 9: 453–457.
- Fuentealba RA, Liu Q, Zhang J, Kanekiyo T, Hu X, et al. (2010) Low-density lipoprotein receptor-related protein 1 (LRP1) mediates neuronal Abeta42 uptake and lysosomal trafficking. *PLoS One* 5: e11884.
- Omtri RS, Davidson MW, Arumugam B, Poduslo JF, Kandimalla KK (2012) Differences in the cellular uptake and intracellular itineraries of amyloid beta proteins 40 and 42: ramifications for the Alzheimer's drug discovery. *Mol Pharm* 9: 1887–1897.
- Saavedra L, Mohamed A, Ma V, Kar S, de Chaves EP (2007) Internalization of beta-amyloid peptide by primary neurons in the absence of apolipoprotein E. *J Biol Chem* 282: 35722–35732.
- Yu C, Nwabuisi-Heath E, Laxton K, Ladu MJ (2010) Endocytic pathways mediating oligomeric Abeta42 neurotoxicity. *Mol Neurodegener* 5: 19.
- Jiang M, Chen G (2009) Ca<sup>2+</sup> regulation of dynamin-independent endocytosis in cortical astrocytes. *J Neurosci* 29: 8063–8074.
- Lee CY, Landreth GE (2010) The role of microglia in amyloid clearance from the AD brain. *J Neural Transm* 117: 949–960.
- Basak JM, Verghese PB, Yoon H, Kim J, Holtzman DM (2012) Low-density lipoprotein receptor represents an apolipoprotein E-independent pathway of Abeta uptake and degradation by astrocytes. *J Biol Chem* 287: 13959–13971.
- Kanekiyo T, Liu CC, Shimohara M, Li J, Bu G (2012) LRP1 in brain vascular smooth muscle cells mediates local clearance of Alzheimer's amyloid-beta. *J Neurosci* 32: 16458–16465.
- Rossello XS, Igbavboa U, Weisman GA, Sun GY, Wood WG (2012) AP-2beta regulates amyloid beta-protein stimulation of apolipoprotein E transcription in astrocytes. *Brain Res* 1444: 87–95.
- Cha MY, Han SH, Son SM, Hong HS, Choi YJ, et al. (2012) Mitochondria-specific accumulation of amyloid beta induces mitochondrial dysfunction leading to apoptotic cell death. *PLoS One* 7: e34929.
- Pignino G, Morfini G, Atagi Y, Deshpande A, Yu C, et al. (2009) Disruption of fast axonal transport is a pathogenic mechanism for intraneuronal amyloid beta. *Proc Natl Acad Sci U S A* 106: 5907–5912.
- Jin LW, Shie FS, Maczawa I, Vincent I, Bird T (2004) Intracellular accumulation of amyloidogenic fragments of amyloid-beta precursor protein in neurons with Niemann-Pick type C defects is associated with endosomal abnormalities. *Am J Pathol* 164: 975–985.

## Author Contributions

Conceived and designed the experiments: RZ. Performed the experiments: YL DC RC XZ TW. Analyzed the data: YL DC RC. Contributed reagents/materials/analysis tools: JL. Wrote the paper: YL JL RZ.

51. Walsh DM, Klyubin I, Fadeeva JV, Cullen WK, Anwyl R, et al. (2002) Naturally secreted oligomers of amyloid beta protein potently inhibit hippocampal long-term potentiation in vivo. *Nature* 416: 535–539.
52. Shankar GM, Li S, Mehta TH, Garcia-Munoz A, Shepardson NE, et al. (2008) Amyloid-beta protein dimers isolated directly from Alzheimer's brains impair synaptic plasticity and memory. *Nat Med* 14: 837–842.
